# Supplementary material for: The experiences and perceptions of people with chronic and rare diseases during political-economic sanctions in Iran: a qualitative study
Source: PubMed Central journal article supplement (PMC10913614; doi:10.1186/s12913-024-10786-7), 2024-03-05
Supplement: 12913_2024_10786_MOESM1_ESM.pdf [file 12913_2024_10786_MOESM1_ESM.pdf]

(Appendix 1): Interview guide, main questions, probing questions

| Age<br>Gender<br>Education status<br>Employment |                                                                                                    |                                                                                                                                                                                                                                           |
|-------------------------------------------------|----------------------------------------------------------------------------------------------------|-------------------------------------------------------------------------------------------------------------------------------------------------------------------------------------------------------------------------------------------|
|                                                 | <b>Main questions</b>                                                                              | <b>Probing questions</b>                                                                                                                                                                                                                  |
| 1                                               | How do you assess your illness condition in recent years?                                          | <ul style="list-style-type: none"> <li>• Have you perceived any change in your health and illness condition in recent years?</li> <li>• Have you perceived any difficulties in managing your illness in recent years?</li> </ul>          |
| 2                                               | Do you think that economic sanctions have had effects on your illness condition in recent years?   | <ul style="list-style-type: none"> <li>• If yes, how it influenced your illness condition?</li> <li>• If not, what else have you perceived as the main reason of the difficulties you've experienced in managing your disease?</li> </ul> |
| 3                                               | Do you think that economic sanctions have influenced the health conditions of your family members? | <ul style="list-style-type: none"> <li>• If yes, how it influenced their health?</li> <li>• If not, what else do you think has been most important in influencing the health status of your family in recent years?</li> </ul>            |

|   |                                                                                                                                                                                                                                                                                    |                                                                                                                                                                                                                 |
|---|------------------------------------------------------------------------------------------------------------------------------------------------------------------------------------------------------------------------------------------------------------------------------------|-----------------------------------------------------------------------------------------------------------------------------------------------------------------------------------------------------------------|
| 4 | <p>Generally, how do you perceive the impact of international economic on Iranian's health?</p>                                                                                                                                                                                    | <ul style="list-style-type: none"> <li>• If yes, how it influenced the health of population?</li> <li>• If not, what else do you think has been most important in influencing the population health?</li> </ul> |
| 5 | <p>Looking back, do you think which imposed sanctions have had stronger negative effects on public health, if at all?</p> <ul style="list-style-type: none"> <li>• Sanctions at the time of Ahmadinejad's presidency</li> <li>• Current sanctions by US president Trump</li> </ul> | <ul style="list-style-type: none"> <li>• Why do you think so?</li> </ul>                                                                                                                                        |
