# Supplementary material for: The experiences and perceptions of people with chronic and rare diseases during political-economic sanctions in Iran: a qualitative study
Source: PubMed Central journal article supplement (PMC10913614; doi:10.1186/s12913-024-10786-7), 2024-03-05
Supplement: 12913_2024_10786_MOESM2_ESM.pdf [file 12913_2024_10786_MOESM2_ESM.pdf]

(Appendix 2): Patients by disease and provinces

| <b>Diseases/ province</b> | <b>Tehran</b> | <b>Hamedan</b> | <b>Yazd</b> | <b>Sistan-baluchestan</b> |
|---------------------------|---------------|----------------|-------------|---------------------------|
| <b>Diabetes</b>           | 2             | 1              | 3           |                           |
| <b>Thalassemia</b>        | 3             |                | 2           | 2                         |
| <b>Cancer</b>             | 2             | 1              | 1           |                           |
| <b>Hemophilia</b>         |               | 1              | 2           | 1                         |
| <b>Kidney transplant</b>  | 3             | 2              | 3           | 1                         |
| <b>Total</b>              | 31            |                |             |                           |
